# Supplementary material for: Linking Primary Care Patients to Mental Health Care via Behavioral Health Social Workers: A Stepped-Wedge Study
Source: Atypon-hosted journal article supplement (doi:10.1176/appi.ps.202100322), 2022-01-07
Supplement: appi.ps.202100322.ds001.pdf [file appi.ps.202100322.ds001.pdf]

Table A. International Classification of Diseases (ICD) 10 Codes for Depression and Anxiety

| <b>ICD-10</b>        | <b>Number of patients</b> |
|----------------------|---------------------------|
| Depression Diagnosis |                           |
| F32                  | 17,838                    |
| F33                  | 6,545                     |
| F34                  | 988                       |
| F41                  | 9,213                     |
| F53                  | 265                       |
| Anxiety Diagnosis    |                           |
| F06                  | 18                        |
| F40                  | 15                        |
| F41                  | 43,604                    |
| F43                  | 8,312                     |

Figure A. Timeline of when each group of practices transitioned from pre-implementation to post-implementation status

| Group | 2016  |       |       |       | 2017  |       |       |       | 2018  |       |       |       | 2019  |       |       |       | 2020  |
|-------|-------|-------|-------|-------|-------|-------|-------|-------|-------|-------|-------|-------|-------|-------|-------|-------|-------|
|       | Qtr 1 | Qtr 2 | Qtr 3 | Qtr 4 | Qtr 1 | Qtr 2 | Qtr 3 | Qtr 4 | Qtr 1 | Qtr 2 | Qtr 3 | Qtr 4 | Qtr 1 | Qtr 2 | Qtr 3 | Qtr 4 | Qtr 1 |
| 1     | Light | Dark  |
| 2     | Light | Dark  |
| 3     | Light | Dark  |
| 4     | Light | Dark  |
| 5     | Light | Dark  |
| 6     | Light | Dark  | Dark  | Dark  | Dark  | Dark  | Dark  |
| 7     | Light | Dark  | Dark  | Dark  | Dark  | Dark  |

Qtr = quarter

Light grey = pre-implementation period

Dark grey = post-implementation period

Table B. The Adjusted Odds of Having a Behavioral Health Visit

| Adjusted odds of having a behavioral visit |                 |       |      |              |       |      |                        |       |      |
|--------------------------------------------|-----------------|-------|------|--------------|-------|------|------------------------|-------|------|
|                                            | Depression Only |       |      | Anxiety Only |       |      | Depression and Anxiety |       |      |
|                                            | AOR             | 95%CI |      | AOR          | 95%CI |      | AOR                    | 95%CI |      |
| Post period (versus pre-period)            | 4.35            | 3.50  | 5.41 | 4.27         | 3.57  | 5.11 | 3.26                   | 2.77  | 3.84 |
| Increase in 1 year of age                  | 0.97            | 0.97  | 0.98 | 0.98         | 0.98  | 0.98 | 0.98                   | 0.98  | 0.99 |
| Female (versus male)                       | 1.21            | 1.06  | 1.39 | 1.14         | 1.04  | 1.25 | 1.31                   | 1.18  | 1.45 |
| Black race (versus White race)             | 1.52            | 1.27  | 1.82 | 1.48         | 1.30  | 1.70 | 1.89                   | 1.64  | 2.18 |
| Other race (versus White race)*            | 1.60            | 1.27  | 2.02 | 1.47         | 1.27  | 1.71 | 1.66                   | 1.42  | 1.94 |
| Medicare (versus private)                  | 1.06            | 0.85  | 1.32 | 0.95         | 0.79  | 1.13 | 0.97                   | 0.81  | 1.17 |
| Medicaid (versus private)                  | 0.84            | 0.70  | 1.02 | 1.04         | 0.90  | 1.19 | 0.94                   | 0.82  | 1.08 |
| Other (versus private)                     | 1.05            | 0.69  | 1.61 | 0.90         | 0.66  | 1.22 | 1.16                   | 0.84  | 1.60 |
| Married or partnered (versus not)          | 0.71            | 0.61  | 0.82 | 0.89         | 0.80  | 0.98 | 0.89                   | 0.80  | 0.99 |

The other race category was composed of 55% of individuals who did not identify their race, 30% who identified as Multiracial/Multicultural, 15% who identified as Asian, and 2% who identified as American Indian/Alaskan Native.
